# Supplementary material for: When Theory Meets Practice: Balancing Genetic Diversity and Behaviour When Choosing Founders for a Recently Reintroduced Bison (Bison bison) Herd in Banff National Park, Canada
Source: MDPI journal article supplement (doi:10.3390/d15030366), 2023-03-03
Supplement: s1 [file s1]

**Table S1.** Allele frequencies at each locus for the Elk Island NP population, proposed Banff NP founders, actual Banff NP founders, and the actual founders plus the 2017 calves.

| <b>BM143 Allele Frequencies</b> |            |            |            |            |            |
|---------------------------------|------------|------------|------------|------------|------------|
|                                 | <b>101</b> | <b>103</b> | <b>105</b> | <b>111</b> | <b>115</b> |
| Elk Island                      | 0.259      | 0.129      | 0.233      | 0.190      | 0.190      |
| Proposed founders               | 0.219      | 0.094      | 0.313      | 0.219      | 0.156      |
| Actual founders                 | 0.188      | 0.094      | 0.250      | 0.250      | 0.219      |
| Founders and calves             | 0.212      | 0.077      | 0.231      | 0.269      | 0.212      |

| <b>BM2830 Allele Frequencies</b> |            |            |            |            |            |            |            |
|----------------------------------|------------|------------|------------|------------|------------|------------|------------|
|                                  | <b>143</b> | <b>151</b> | <b>153</b> | <b>157</b> | <b>159</b> | <b>163</b> | <b>165</b> |
| Elk Island                       | 0.078      | 0.147      | 0.060      | 0.112      | 0.362      | 0.164      | 0.078      |
| Proposed founders                | 0.094      | 0.063      | 0.094      | 0.125      | 0.281      | 0.313      | 0.031      |
| Actual founders                  | 0.094      | 0.125      | 0.094      | 0.063      | 0.250      | 0.281      | 0.094      |
| Founders and calves              | 0.077      | 0.115      | 0.096      | 0.058      | 0.308      | 0.269      | 0.077      |

| <b>BMC1222 Allele Frequencies</b> |            |            |            |
|-----------------------------------|------------|------------|------------|
|                                   | <b>267</b> | <b>273</b> | <b>275</b> |
| Elk Island                        | 0.302      | 0.009      | 0.690      |
| Proposed founders                 | 0.406      | 0          | 0.594      |
| Actual founders                   | 0.375      | 0          | 0.625      |
| Founders and calves               | 0.385      | 0          | 0.615      |

| <b>BMC1225 Allele Frequencies</b> |            |            |            |            |            |            |            |
|-----------------------------------|------------|------------|------------|------------|------------|------------|------------|
|                                   | <b>240</b> | <b>244</b> | <b>246</b> | <b>248</b> | <b>252</b> | <b>268</b> | <b>270</b> |
| Elk Island                        | 0.405      | 0.095      | 0.069      | 0.103      | 0.129      | 0.009      | 0.190      |
| Proposed founders                 | 0.188      | 0.094      | 0.125      | 0.094      | 0.156      | 0          | 0.344      |
| Actual founders                   | 0.250      | 0.094      | 0.125      | 0.125      | 0.125      | 0          | 0.281      |
| Founders and calves               | 0.250      | 0.115      | 0.115      | 0.115      | 0.173      | 0          | 0.231      |

| <b>BOVFSH Allele Frequencies</b> |            |            |            |            |            |            |            |            |            |            |            |            |
|----------------------------------|------------|------------|------------|------------|------------|------------|------------|------------|------------|------------|------------|------------|
|                                  | <b>297</b> | <b>298</b> | <b>299</b> | <b>302</b> | <b>303</b> | <b>308</b> | <b>309</b> | <b>310</b> | <b>313</b> | <b>316</b> | <b>321</b> | <b>322</b> |
| Elk Island                       | 0.060      | 0.043      | 0.009      | 0.078      | 0.069      | 0.112      | 0.267      | 0.086      | 0.052      | 0.026      | 0.147      | 0.052      |
| Proposed founders                | 0.156      | 0          | 0.031      | 0.156      | 0.094      | 0.063      | 0.219      | 0.063      | 0.031      | 0          | 0.156      | 0.031      |
| Actual founders                  | 0.125      | 0          | 0          | 0.063      | 0.063      | 0.031      | 0.250      | 0.156      | 0.063      | 0.031      | 0.156      | 0.063      |
| Founders and calves              | 0.135      | 0.019      | 0          | 0.038      | 0.058      | 0.058      | 0.308      | 0.135      | 0.077      | 0.019      | 0.115      | 0.038      |

| <b>Eth121 Allele Frequencies</b> |            |            |            |            |            |            |
|----------------------------------|------------|------------|------------|------------|------------|------------|
|                                  | <b>184</b> | <b>186</b> | <b>194</b> | <b>196</b> | <b>198</b> | <b>200</b> |
| Elk Island                       | 0.321      | 0.286      | 0.107      | 0.045      | 0.018      | 0.223      |
| Proposed founders                | 0.375      | 0.375      | 0.031      | 0.063      | 0          | 0.156      |
| Actual founders                  | 0.313      | 0.406      | 0.063      | 0.063      | 0          | 0.156      |
| Founders and calves              | 0.250      | 0.346      | 0.058      | 0.058      | 0          | 0.288      |

| <b>RT24 Allele Frequencies</b> |            |            |            |            |            |
|--------------------------------|------------|------------|------------|------------|------------|
|                                | <b>205</b> | <b>213</b> | <b>225</b> | <b>229</b> | <b>231</b> |
| Elk Island                     | 0.664      | 0.017      | 0.190      | 0.086      | 0.043      |
| Proposed founders              | 0.594      | 0.031      | 0.250      | 0.063      | 0.063      |
| Actual founders                | 0.688      | 0          | 0.219      | 0.063      | 0.031      |
| Founders and calves            | 0.692      | 0          | 0.192      | 0.096      | 0.019      |

| <b>RT27 Allele Frequencies</b> |            |            |            |            |
|--------------------------------|------------|------------|------------|------------|
|                                | <b>146</b> | <b>148</b> | <b>150</b> | <b>152</b> |
| Elk Island                     | 0.028      | 0.056      | 0.907      | 0.009      |
| Proposed founders              | 0.071      | 0.071      | 0.821      | 0.036      |
| Actual founders                | 0.067      | 0.067      | 0.833      | 0.033      |
| Founders and calves            | 0.060      | 0.060      | 0.860      | 0.020      |

| <b>RT29 Allele Frequencies</b> |            |            |            |            |            |            |
|--------------------------------|------------|------------|------------|------------|------------|------------|
|                                | <b>206</b> | <b>212</b> | <b>214</b> | <b>216</b> | <b>218</b> | <b>220</b> |
| Elk Island                     | 0.121      | 0.371      | 0.112      | 0.043      | 0.138      | 0.216      |
| Proposed founders              | 0.125      | 0.344      | 0.094      | 0.063      | 0.094      | 0.281      |
| Actual founders                | 0.063      | 0.375      | 0.063      | 0.031      | 0.094      | 0.375      |
| Founders and calves            | 0.038      | 0.365      | 0.077      | 0.115      | 0.096      | 0.308      |

| <b>RT9 Allele Frequencies</b> |            |            |            |
|-------------------------------|------------|------------|------------|
|                               | <b>113</b> | <b>115</b> | <b>117</b> |
| Elk Island                    | 0.474      | 0.164      | 0.362      |
| Proposed founders             | 0.375      | 0.125      | 0.500      |
| Actual founders               | 0.406      | 0.125      | 0.469      |
| Founders and calves           | 0.404      | 0.192      | 0.404      |
